# Supplementary material for: Line Tension and Stability of Domains in Cell-Adhesion Zones Mediated by Long and Short Receptor-Ligand Complexes
Source: PubMed Central journal article supplement (PMC3157351; doi:10.1371/journal.pone.0023284), 2011-08-17
Supplement: pone.0023284.s001.pdf [file pone.0023284.s001.pdf]

# Appendix S1: Dimensional analysis

## Independent parameters

The starting point of our scaling analysis is the continuous equivalent

$$\mathcal{H}_{\text{ef}} = \iint dx dy \left[ \frac{\kappa}{2} (\Delta l)^2 + V_{\text{ef}}(l) \right]$$

of the discrete effective conformational energy (6). Here,  $\Delta = (\partial^2/\partial x^2) + (\partial^2/\partial y^2)$  is the Laplace operator. The elastic energy depends on the bending rigidity  $\kappa$ , and the effective potential  $V_{\text{ef}}$  depends on the depths  $U_1^{\text{ef}}$  and  $U_2^{\text{ef}}$  as well as the width  $l_{\text{we}}$  and separation  $l_{\text{ba}}$  of the two wells (see fig. 1). To reduce the numbers of parameters, we introduce the dimensionless coordinates  $\tilde{x}$ ,  $\tilde{y}$  and  $\tilde{l}$  defined by

$$x = \tilde{x} l_{\text{we}} \sqrt{\frac{\kappa}{k_B T}}, \quad y = \tilde{y} l_{\text{we}} \sqrt{\frac{\kappa}{k_B T}}, \quad l = \tilde{l} l_{\text{we}}$$

With these coordinates, we obtain

$$\mathcal{H}_{\text{ef}}/k_B T = \iint d\tilde{x} d\tilde{y} \left[ \frac{1}{2} (\tilde{\Delta} \tilde{l})^2 + \tilde{V}_{\text{ef}}(\tilde{l}) \right]$$

with

$$\tilde{\Delta} \tilde{l} = \Delta l \frac{\kappa l_{\text{we}}}{k_B T} \quad \text{and} \quad \tilde{V}_{\text{ef}}(\tilde{l}) = \frac{\kappa l_{\text{we}}^2}{(k_B T)^2} V_{\text{ef}}(l)$$

The three dimensionless, independent parameters thus turn out to be

$$u_1 = \frac{U_1^{\text{ef}} \kappa l_{\text{we}}^2}{(k_B T)^2}, \quad u_2 = \frac{U_2^{\text{ef}} \kappa l_{\text{we}}^2}{(k_B T)^2}, \quad \frac{l_{\text{ba}}}{l_{\text{we}}}$$

## Line tension scaling

We consider now a one-dimensional interface, or line,  $\Gamma$  and its energy

$$E_\lambda = \int_\Gamma ds \lambda$$

with line tension  $\lambda$ . The integration is performed along the contour  $\Gamma$  that lies in the x-y plane. In analogy to the previous section, we introduce the dimensionless coordinate  $\tilde{s}$  defined by

$$s = \tilde{s} l_{\text{we}} \sqrt{\frac{\kappa}{k_B T}}$$

The line energy is then

$$E_\lambda = k_B T \int d\tilde{s} \tilde{\lambda}$$

with the dimensionless line tension

$$\tilde{\lambda} = \frac{\lambda l_{\text{we}} \kappa^{1/2}}{(k_B T)^{3/2}}$$

In general,  $\tilde{\lambda}$  is a function of the three dimensionless parameters  $u_1$ ,  $u_2$  and  $l_{\text{ba}}/l_{\text{we}}$ . But for the symmetric double-well potential with  $u_1 = u_2 = u$ , the dimensionless line tension  $\tilde{\lambda}$  depends only on the two parameters  $u$  and  $l_{\text{ba}}/l_{\text{we}}$ . The Monte Carlo results shown in fig. 6 indicate that  $\tilde{\lambda}$  is proportional to  $u - u_c$  in the vicinity of the critical point  $u_c$ . Close to the critical point, the dimensionless line tension thus can be written in the form

$$\tilde{\lambda} \approx g(l_{\text{ba}}/l_{\text{we}})(u - u_c)$$

with an unknown function  $g$ . From this equation, we now obtain the scaling form (23) of the line tension  $\lambda$ .
